# Supplementary material
Source: Springer Nature journal article supplement (https://www.springermedizin.de/resource/supplementary/12947_2012_431_MOESM1_ESM.pdf/9555740)
Supplement: MOESM1 [file 9555740]

150 consecutive patients with stable angina pectoris that underwent PCI to LAD and LCX

Clinical exclusion criteria (n=12) or No plaque with moderate stenosis (n=21)

117 plaques with moderate stenosis in LAD and LCX

Plaques with moderate stenosis located distal to the PCI target (n=25)

Plaques with an arc of calcification  $>60^\circ$  (n=11)

Imaging quality was not adequate for analysis (n=23)

36 plaques with moderate stenosis  
(an arc of calcification  $\leq 10^\circ$ )  
Less calcified group

22 plaques with moderate stenosis  
( $10^\circ <$  an arc of calcification  $\leq 60^\circ$ )  
Moderately calcified group
